# Supplementary material for: Adipsin-Dependent Secretion of Hepatocyte Growth Factor Regulates the Adipocyte-Cancer Stem Cell Interaction
Source: MDPI journal article supplement (doi:10.3390/cancers13164238), 2021-08-23
Supplement: s1 [file s1]

|            |     |                                                               |
|------------|-----|---------------------------------------------------------------|
| Human CFD  | 1   | MHSWERLAVLVLLGAAACAAPPRGRILGGREAEAHARPYMASVQINGAHLCCGGVLVAEQW |
| Murine Cfd | 1   | MHSSVYFVALVILGAAVCAAQPRGRILGGQEAAAHARPYMASVQVNGTHVCGGTLLDEQW  |
| Human CFD  | 61  | VLSAAHCLLEDAAD-GKVQVLLGAHSLSQPEPSKRLYDVLRAVPHPDSPDPTIDHDLILLQ |
| Murine Cfd | 61  | VLSAAHCMVGVTDDDSVQVLLGAHSLSAPEPYKRWYDVQSVVPHPGSRPDSLEDDLILFK  |
| Human CFD  | 120 | LSEKATLGPAVRPLPWQRVDRDVAPGTLCDVAGWGIVNHAGRRPDSLQHVLLPVLDRAATC |
| Murine Cfd | 121 | LSQNASLGPHVRPLPLQYEDKEVEPGTLCDVAGWGVVTHAGRRPDVLHQLRVSIMNRITC  |
| Human CFD  | 180 | NRRTHHDGAIITERIMCAESNRRDSCKGDSGGPLVCGGVLEGVVTSGSRVCGNRKKPGIYT |
| Murine Cfd | 181 | NLRTYHDGVVTINMMCAESNRRDTCRGDSGSPLVCGDAVEGVVTWGSRVCGNGKKPGVYT  |
| Human CFD  | 240 | RVASYAAWIDSVLA-----                                           |
| Murine Cfd | 241 | RVSSYRMWIENITNGNMTS                                           |
