# Supplementary material for: Adipsin-Dependent Secretion of Hepatocyte Growth Factor Regulates the Adipocyte-Cancer Stem Cell Interaction
Source: Cancers (Basel). 2021 Aug 23;13(16):4238. doi: 10.3390/cancers13164238 (PMC8393397; doi:10.3390/cancers13164238)
Supplement: Supplementary file 1 [file cancers-13-04238-s001.zip]

Archive with 7 entries (7 files):
- Original blot Figure 2C.pdf
- Supplementary  legends for Figures and Table.pdf
- Supplementary Figure S1.pdf
- Supplementary Figure S2.pdf
- Supplementary Figure S3.pdf
- Supplementary Figure S4.pdf
- Supplementary Table S1.xlsx
