# Supplementary material for: Adipsin-Dependent Secretion of Hepatocyte Growth Factor Regulates the Adipocyte-Cancer Stem Cell Interaction
Source: Cancers (Basel). 2021 Aug 23;13(16):4238. doi: 10.3390/cancers13164238 (PMC8393397; doi:10.3390/cancers13164238)
Supplement: Supplementary file 1 [file cancers-13-04238-s001.zip › Supplementary Table S1.xlsx]

## Sheet: Sheet1
Table S1. Adipokine expression profiles of WT and Cfd-KO mADSCs
Expression profile of the 111 murine cytokines was analyzed using Proteome Profiler Mouse XL Cytokine Array Kit (R&D Systems). Relative signal intensities were measured based on the images of the membrane taken using the Fusion Solo S (Vilber, Collégien, France).
	WT mADSCs	Cfd-KO mADSCs
Reference Spots	469.177	487.295
Adiponectin	0	0
Amphiregulin	1.34617	1.87518
Angiopoietin-1	0	0.184115
Angiopoietin-2	3.81357	2.24314
Angiopoietin-like3	2.30901	1.37515
BAFF	0.0416904	1.02462
C1qR1	0.474427	0.220834
CCL2	7.73737	51.0283
CCL3	0.596057	0.894277
CCL5	0	0.835557
Reference Spots	493.123	509.006
-	0	0.398676
CCL6	0.866682	3.1712
CCL11	451.009	420.317
CCL12	100.192	18.6638
CCL17	0	3.39764
CCL19	0	1.59897
CCL20	1.04081	0
CCL21	0.976981	0.421739
CCL22	1.74893	2.02294
CD14	0.571975	0.595814
CD40	0.146658	0.701366
-	0	0
-	0	0
CD160	0	0
Chemerin	0	1.89195
Chitinase 3-like 1	0	1.23015
Coagulation Factor Ⅲ	136.395	99.8371
Complement Component C5/C5a	0	0.739719
Complement Factor D/Adipsin	1	0.120822
CRP	0.00516607	0.452045
CCL22	235.154	214.902
CXCL1	0.270481	2.43732
CXCL2	1.36173	0.0425756
-	0.0352062	0
CXCL9	0	1.5943
CXCL10	0	0
CXCL11	0.79852	0.68144
CXCL13	0.142158	0.178224
CXCL16	1.90076	18.3241
Cystatin C	38.1513	67.6292
DKK-1	1.0351	0.49367
DPPIV	0.322042	0.302803
EGF	0.790131	0.292372
Endoglin	0.725617	1.5343
Endostain	3.95283	2.70758
Fetuin A	0.0736644	1.92054
FGF acidic	0.250964	0.631419
FGF-21	1.39638	0.172893
Flt-3 Ligand	0.640756	0.11879
G-CSF	0	0.679461
G-CSF	0.0809787	1.03138
GDF-15	0.901813	8.56654
GM-CSF	0.866541	0.514705
HGF	10.175	3.13568
ICAM-1	0.403355	0.820082
INF-γ	0.310059	1.1152
IGFBP-1	0.115629	2.32087
IGFBP-2	117.376	364.15
IGFBP-3	1.04252	2.85741
IGFBP-5	4.08068	4.94734
IGFBP-6	314.223	363.681
IL-1α	0.304484	1.39541
IL1β	0.270529	0.452053
IL-1ra	1.01947	1.14647
IL-2	0	0.116064
IL-3	0.0649834	0.636533
IL-4	0.721967	0.993771
IL-5	1.14484	1.29714
IL-6	0.33998	0.80153
IL-7	0.245937	1.20227
IL-10	0.759855	0.382915
IL-11	0.30526	1.95823
IL-12	0.178698	0.8199
IL-13	0.491429	0
IL-15	0.469679	1.11476
IL-17A	0.206766	0.116464
IL-22	0	1.0941
IL-23	0.990176	0
IL-27	1.49042	0.759278
IL-28A	3.25694	0.640177
IL-33	3.16159	0.777868
LDL R	1.31563	0.392932
Leptin	0.293794	1.49857
LIF	0.860379	0.109525
Lipocalin-2	0	1.22151
LIX	0.0698378	1.57155
M-CSF	12.8002	27.9718
MMP-2	168.78	170.324
MMP-3	176.165	422.852
MMP-9	0.173959	0.188251
Myeloperoxidase	1.26965	0.522116
Osteopontin	68.8347	68.8919
Osteopontegerin	0.177953	4.23979
PD-ECGF	1.16233	1.06531
PDGF-BB	0	0
Pentraxin 2	0.344	0
Pentraxin 3	10.9228	3.22099
Periostin	40.797	42.354
Pref-1	0.222976	0.100618
Proliferin	34.5695	19.8789
Proprotein Convertase 9	9.09691	5.6558
RAGE	1.26455	0.856926
RBP4	1.5866	3.14893
Reg3G	1.16451	3.06531
Resistin	0	0.50267
-	0.214955	0.364124
Reference Spots	576.103	542.102
E-Selection	0	0.281081
P-Selection	0	0.662128
Serpin E1	180.655	212.177
Serpin F1	35.2275	42.3179
Thrombopoietin	0.671939	0.745972
TIM-1	1.91036	0.355393
TNF-α	1.64254	0
VCAM-1	6.90581	7.87245
VEGF	18.612	65.0671
WISP-1	61.0486	152.754
Negative Control	0.324468	0.369027
