# Supplementary figures and images for: Adipsin-Dependent Secretion of Hepatocyte Growth Factor Regulates the Adipocyte-Cancer Stem Cell Interaction
Source: MDPI journal article supplement (doi:10.3390/cancers13164238), 2021-08-23

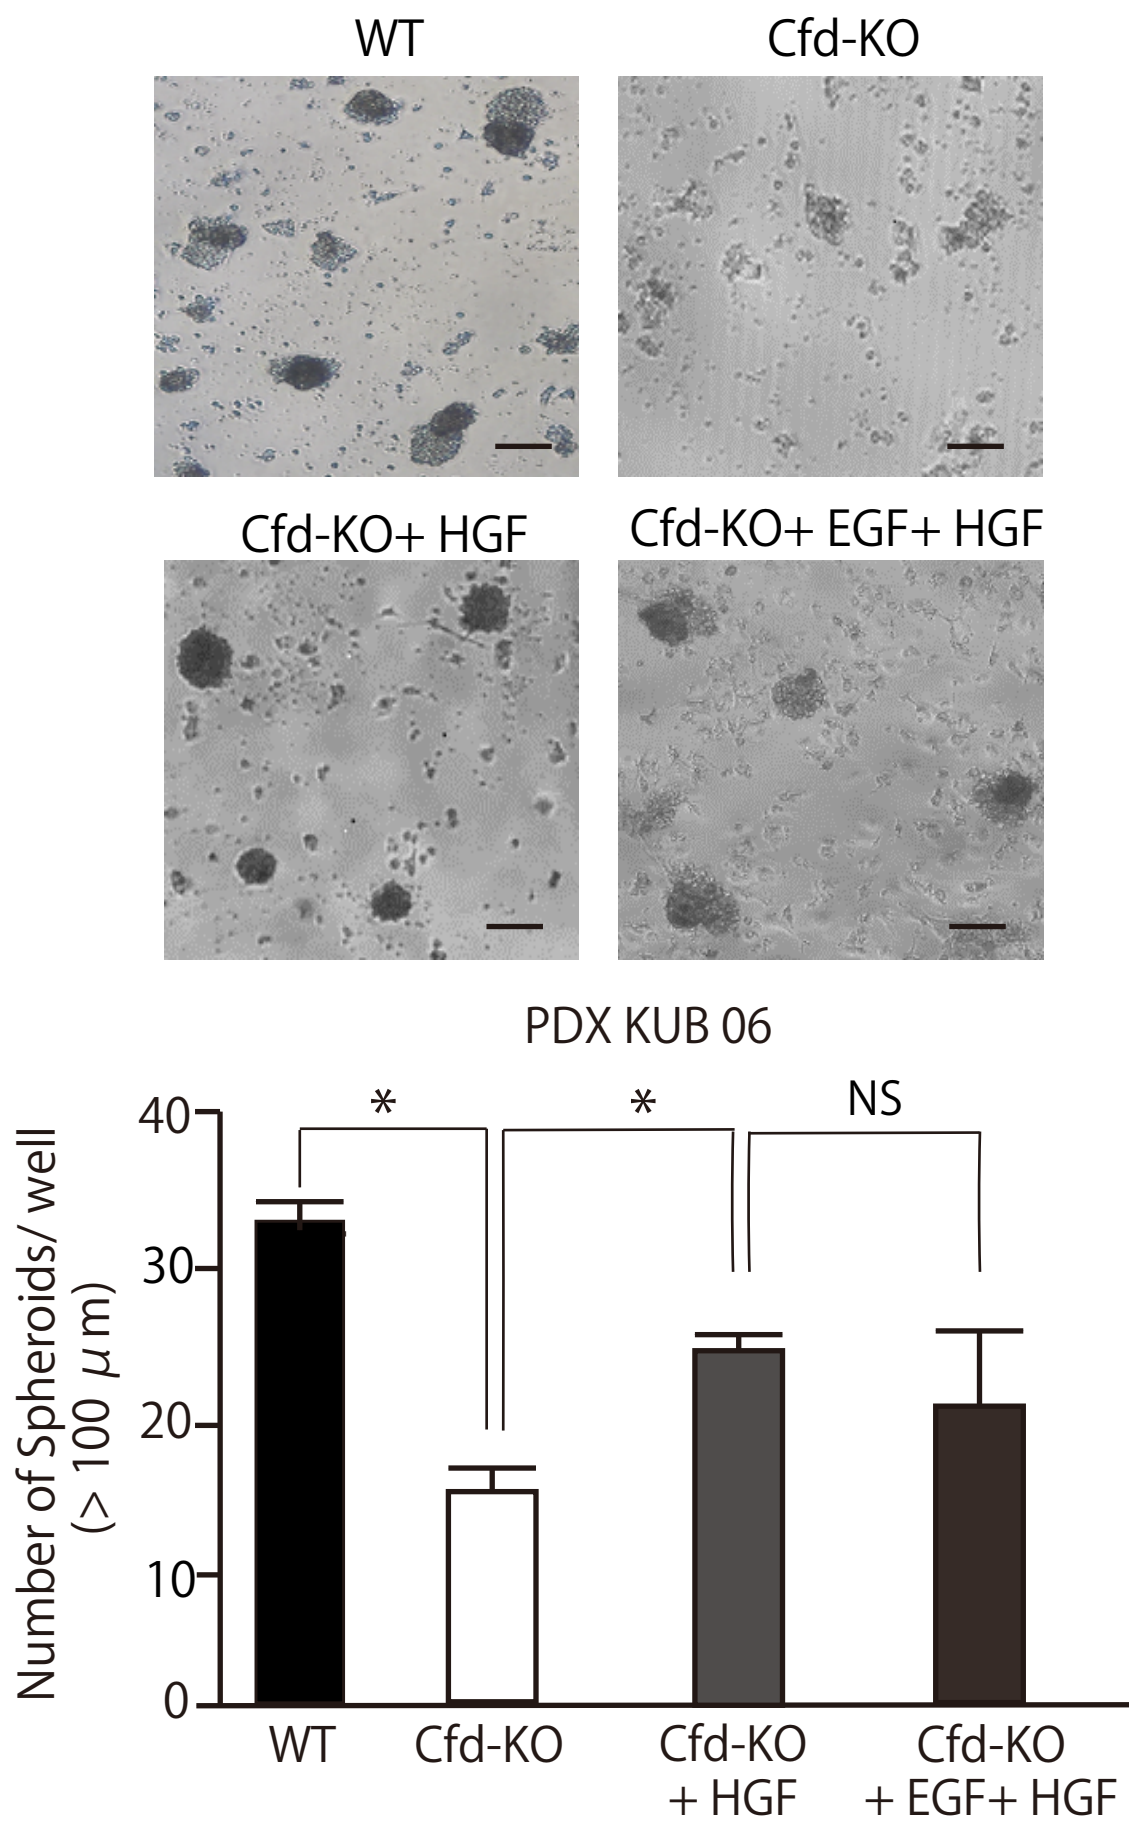

Supplement: s1 [file s1]

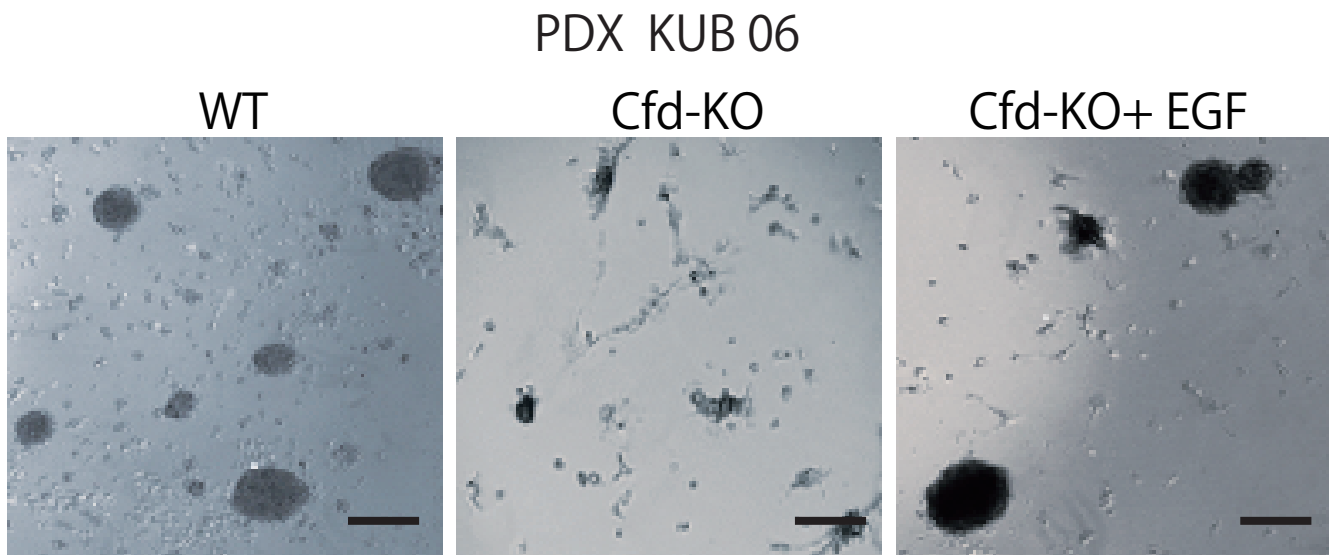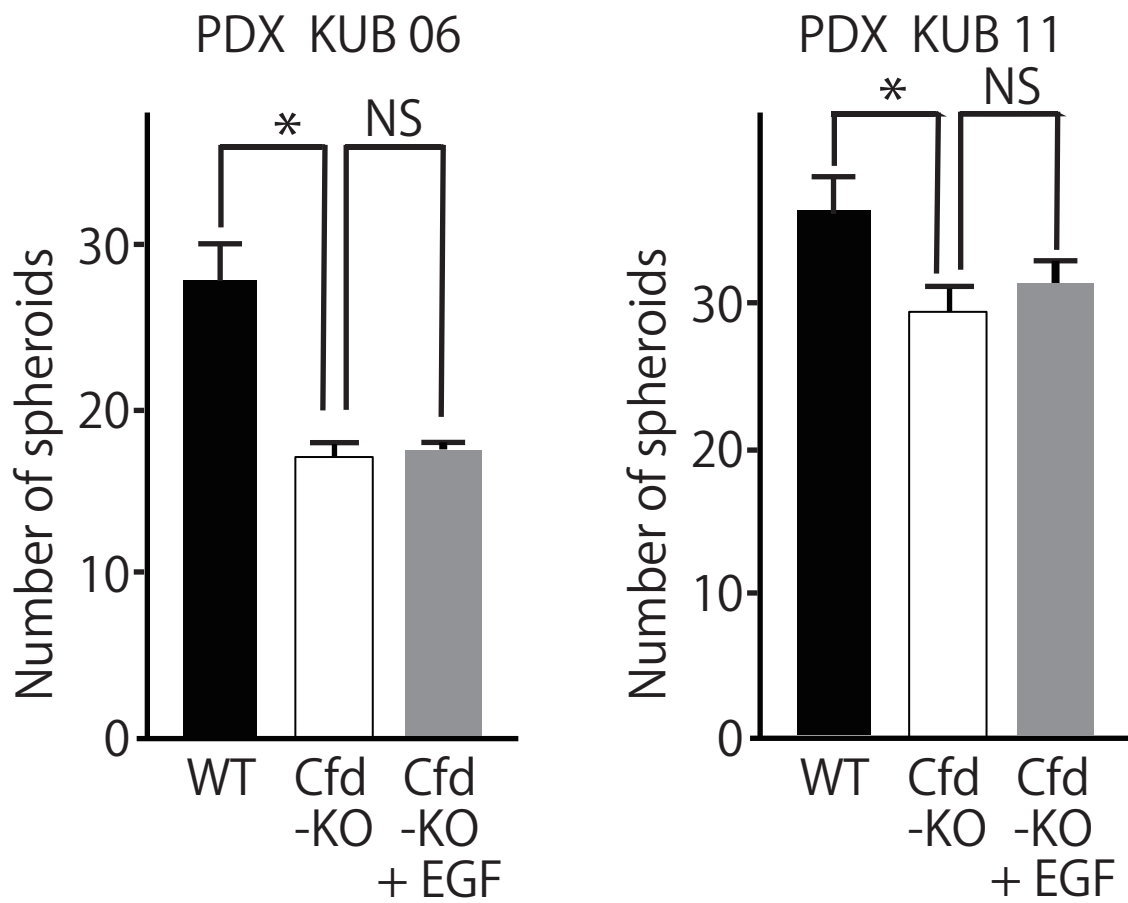

Supplement: s1 [file s1]

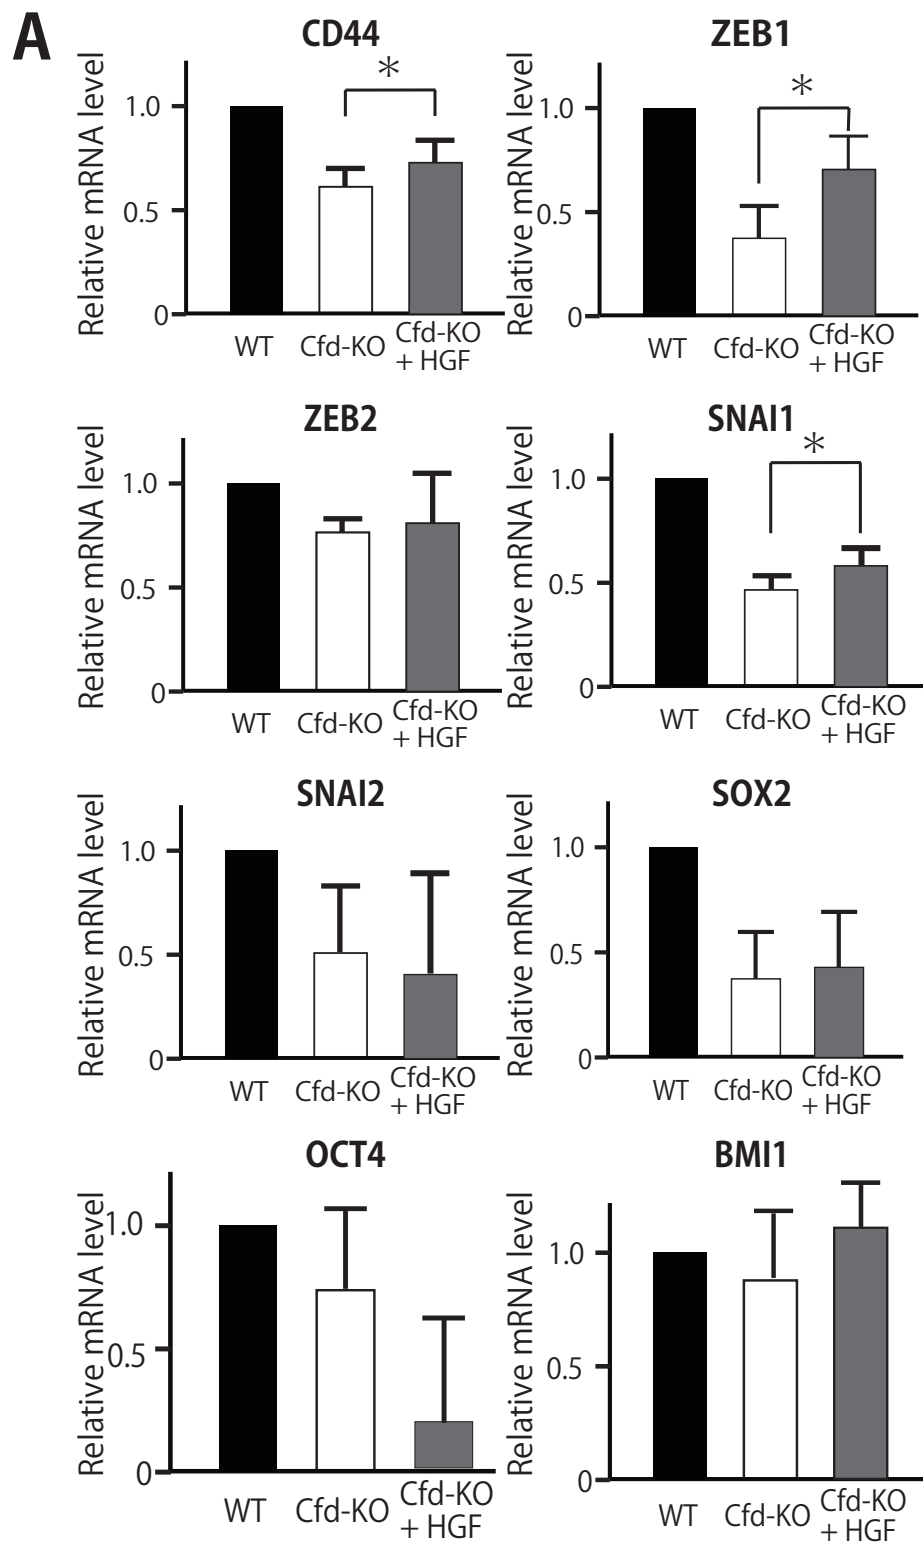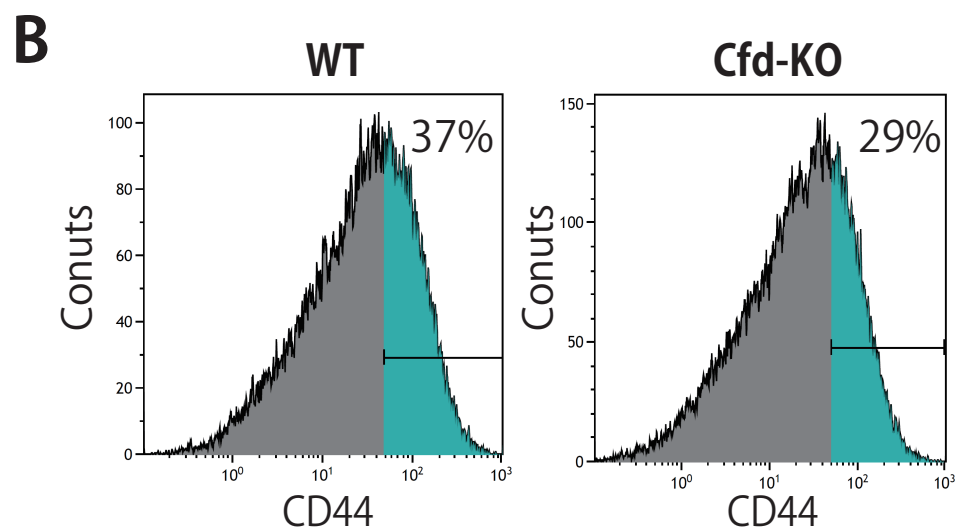

Supplement: s1 [file s1]

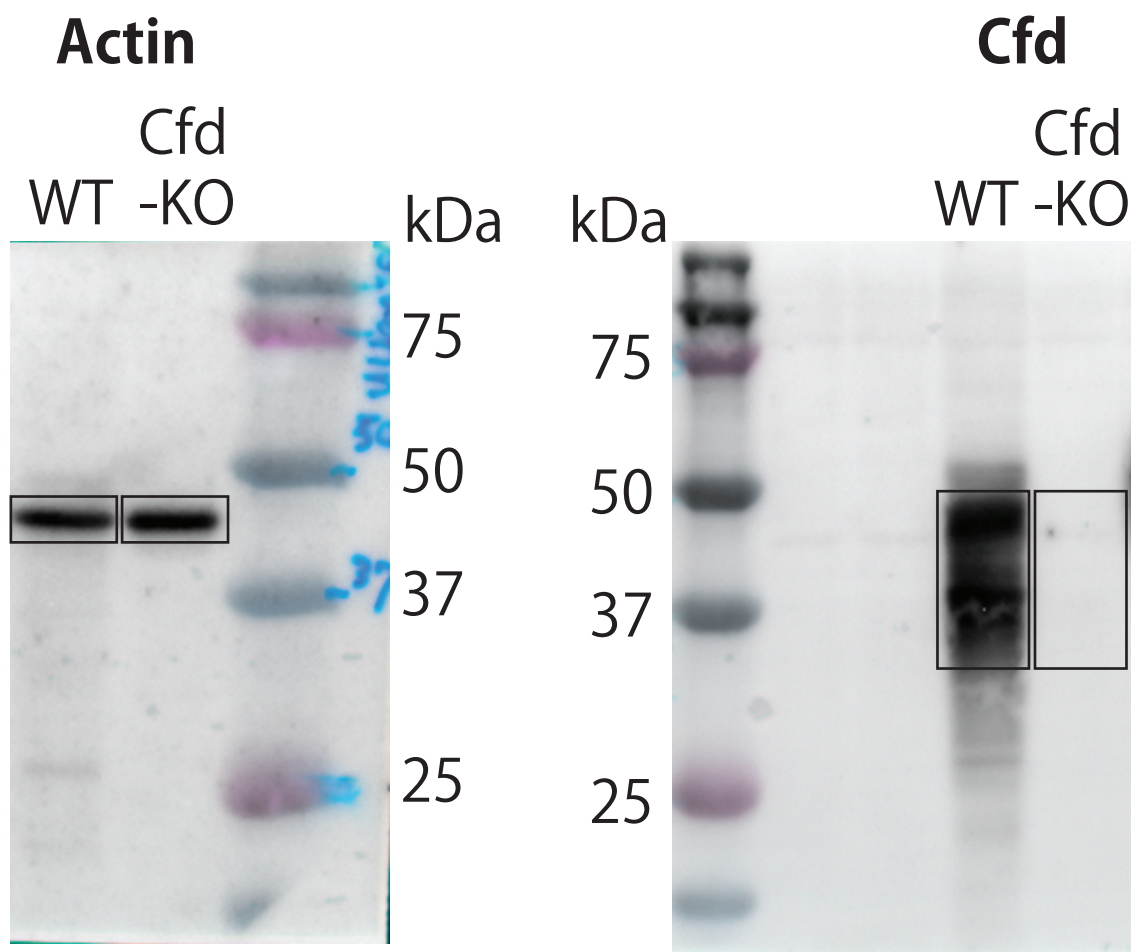

Original blot for Figure 2C

Mizuno M et al.

Supplement: s1 [file s1]
